# Supplementary material for: Ice templating water-stable macroporous polysaccharide hydrogels to mimic plant stems
Source: Royal Society of Chemistry journal article supplement (doi:10.1039/d4tb02204a), 2025-01-01
Supplement: d4tb02204a1.pdf [file d4tb02204a1.pdf]

## Supporting Information

# Ice templating water-stable macroporous polysaccharide hydrogels to mimic plant stems

*Katsuya KOMIYAMA*<sup>1</sup>, *Maya ALLARD*<sup>1</sup>, *Corentin ESCHENBRENNER*<sup>1</sup>, *Clémence SICARD*<sup>2,3</sup>, *Ahmed HAMRAOUI*<sup>1,4</sup> *Francisco M. FERNANDES*<sup>1\*</sup>

<sup>1</sup> Sorbonne Université, UMR 7574, Laboratoire de Chimie de la Matière Condensée de Paris,  
75005, Paris, France

<sup>2</sup> Université de Versailles Saint-Quentin-en Yvelines, UMR 8180, L'Institut Lavoisier de  
Versailles, 78035, Versailles, France

<sup>3</sup> Institut Universitaire de France

<sup>4</sup> Université Paris Cité, CNRS, UMR8003, Saints Pères Paris Institute for the  
Neurosciences, 45, rue des Saints-Pères, 75006 Paris, France

\* Corresponding author. E-mail: francisco.fernandes@sorbonne-universite.fr; Tel: +33 1  
44 27 62 45

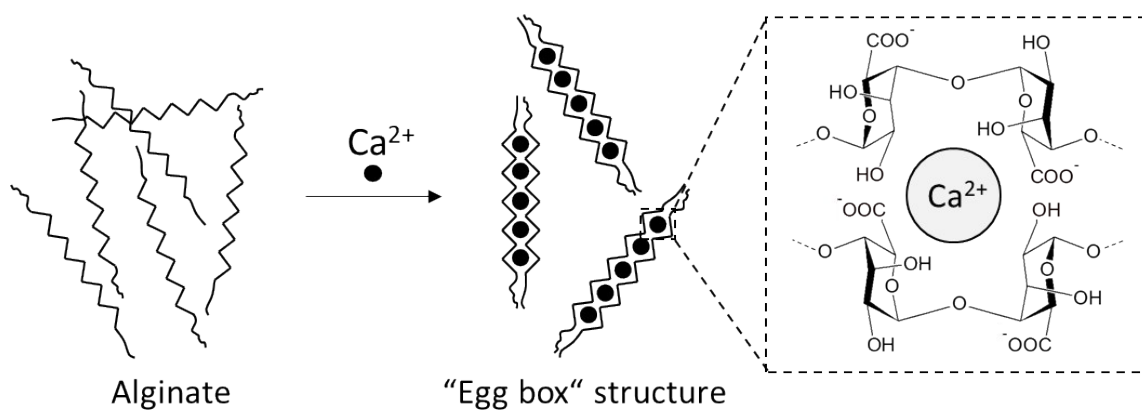

**Figure S1.** Egg-box structure of alginate gel in the presence of  $\text{Ca}^{2+}$ .

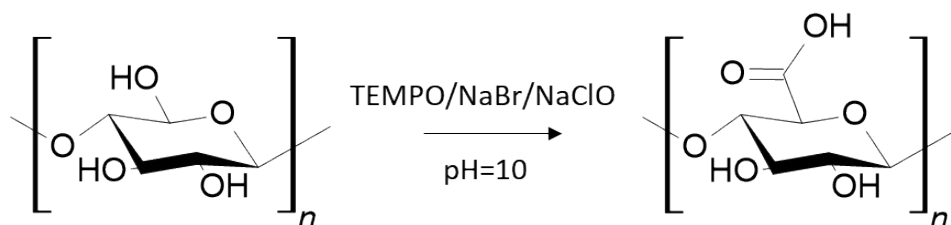

**Figure S2.** Scheme of TEMPO oxidation of cellulose.

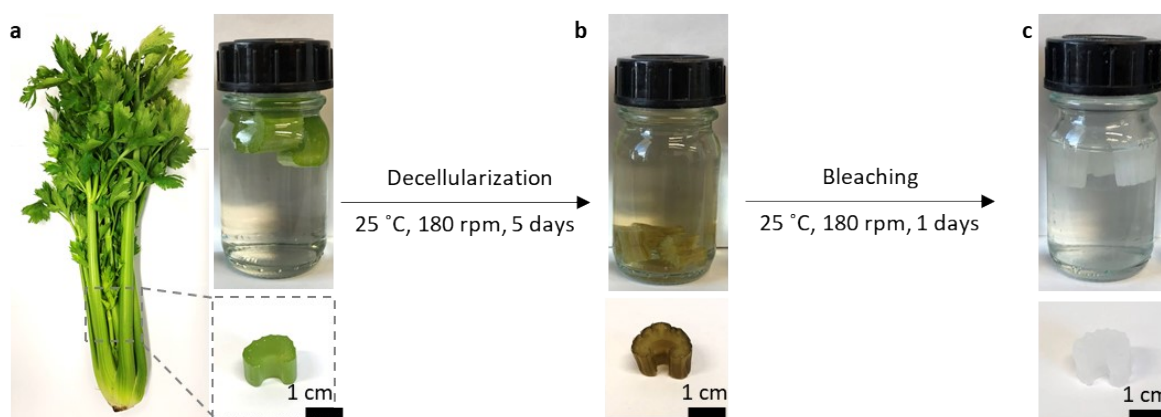

**Figure S3.** The scheme of the decellularization and bleaching for the celery (*Apium graveolens*), (a) The stem of the celery was cut into 1 cm and then (b) cut samples was immersed in 10 % SDS solution for 5 days. (c) After 5 days decellularization, samples are immersed in  $\text{NaClO}$  solution for 1 day for bleaching.

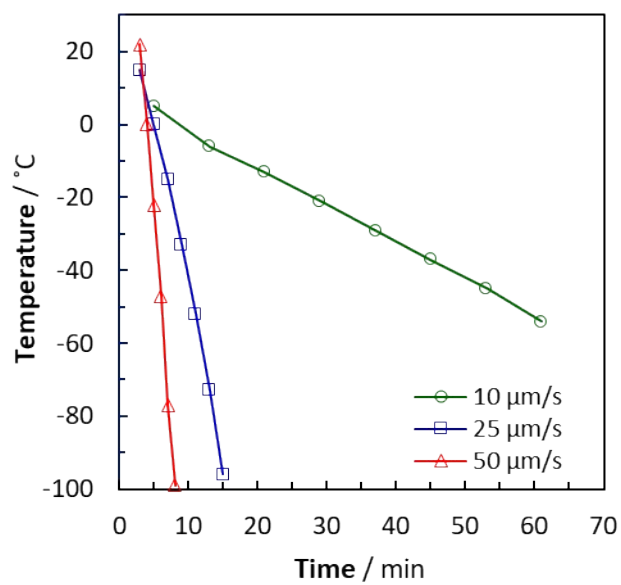

**Figure S4.** 3 cooling temperature profiles applied in this study for the unidirectional ice-templating, resulting in constant ice-front velocity of 10, 25 and 50  $\mu\text{m/s}$ .

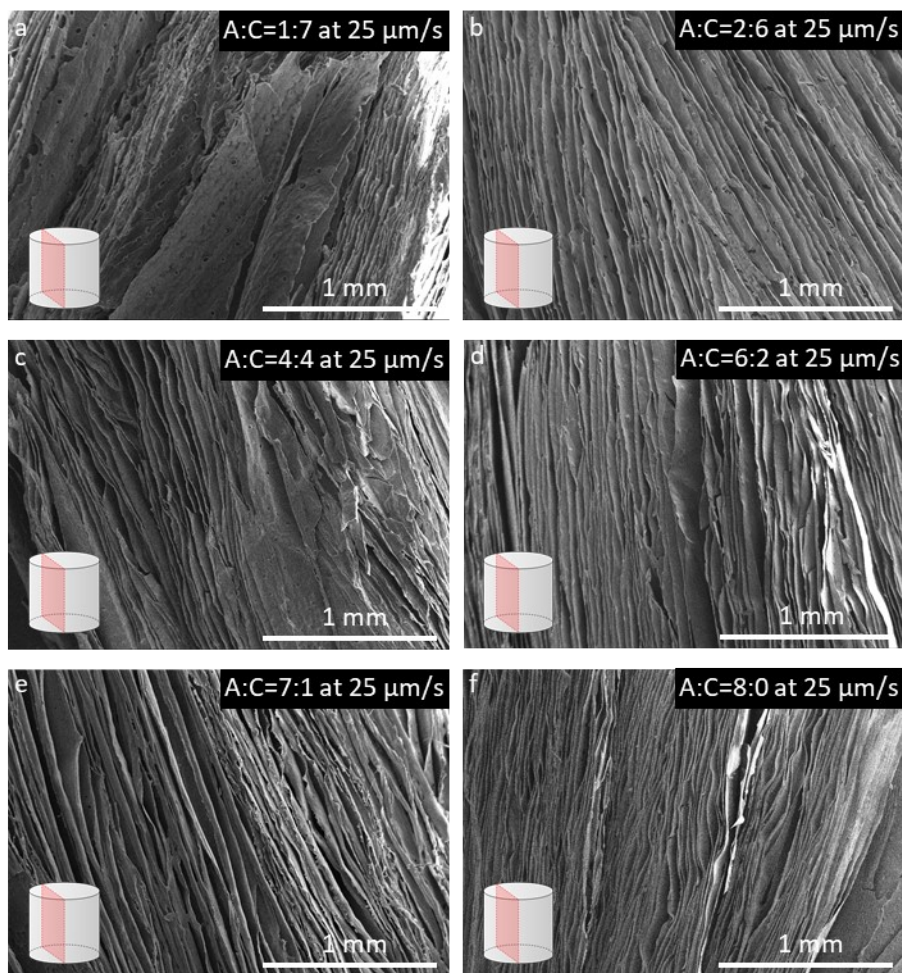

**Figure S5.** SEM images in longitudinal section of Ca-crosslinked hydrogels with the different ratio of alginate and oxidized cellulose prepared at constant ice growth velocity ( $25 \mu\text{m/s}$ ). (a) A:C=8:0, (b) A:C=7:1, (c) A:C=6:2, (d) A:C=4:4, (e) A:C=2:6, and (f) A:C=1:7.

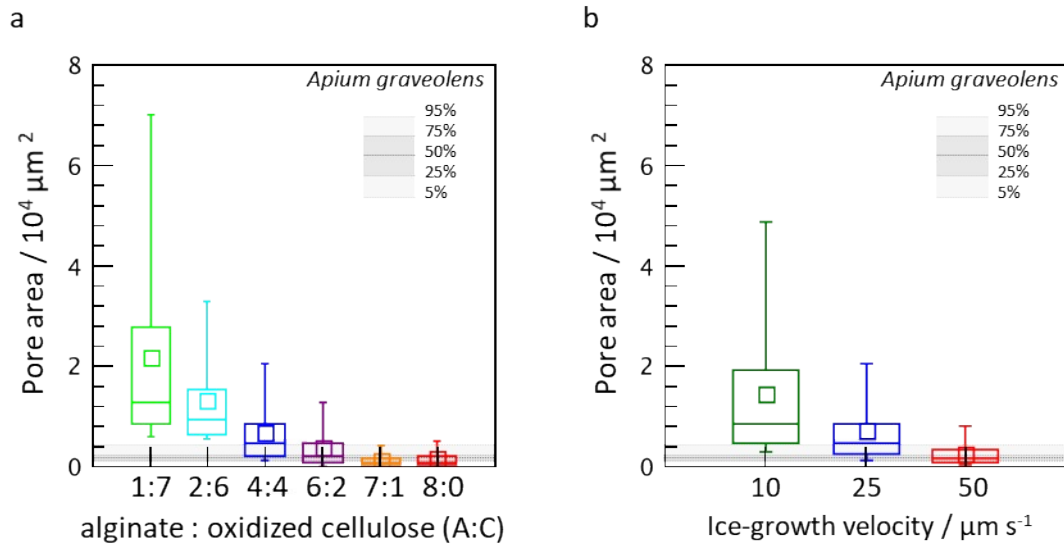

**Figure S6.** Normal scale pore distribution. (a) Summary of the pore area distribution of alginate and oxidized cellulose macroporous hydrogels at different compositions for 25 μm/s (ice growth velocity). (b) Summary of the pore area distribution of alginate and oxidized cellulose macroporous hydrogels (A:C=4:4) at different ice front velocities. Moustaches delimit the 5 and 95 percentiles of the distribution and box limits represent the 1st and 3rd quartiles. Gray horizontal bars depict the pore size distribution of *A. graveolens* xylem vascular system.

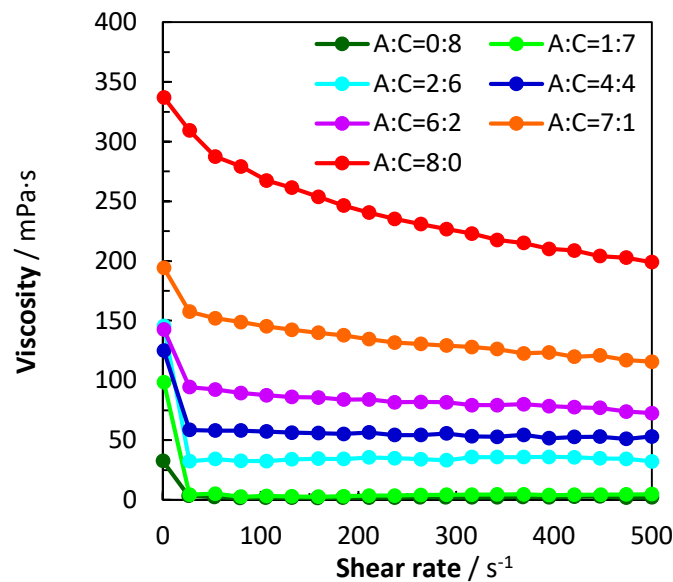

**Figure S7.** Viscosity profile of the suspensions with different ratio of alginate and oxidized cellulose.

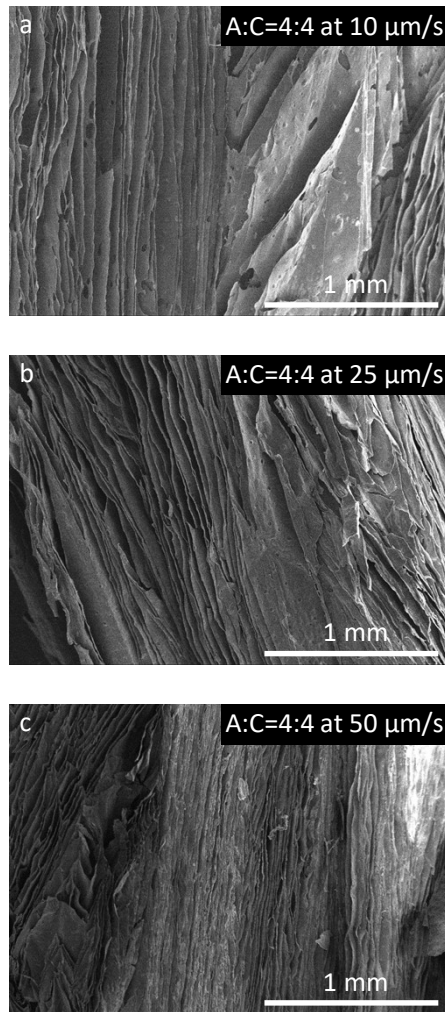

**Figure S8.** SEM images in longitudinal section of Ca-crosslinked hydrogels prepared at different ice growth velocity (10, 25, and 50  $\mu\text{m/s}$ ) at constant ratio of alginate and oxidized cellulose (4:4). (a)  $v = 10 \mu\text{m/s}$ , (b)  $v = 25 \mu\text{m/s}$ , and (c)  $v = 50 \mu\text{m/s}$ .

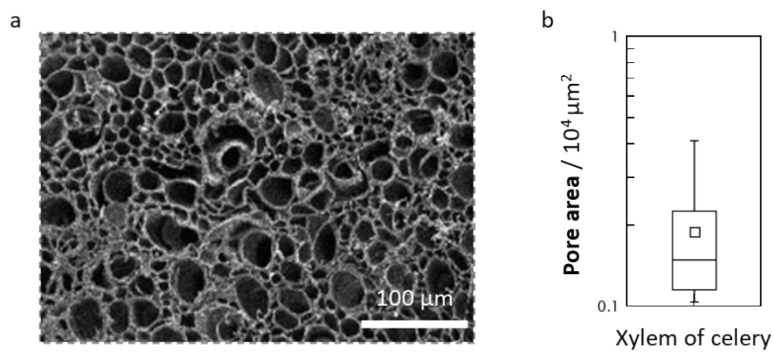

**Figure S9.** (a) SEM image of celery xylem and (b) its pore area distribution.

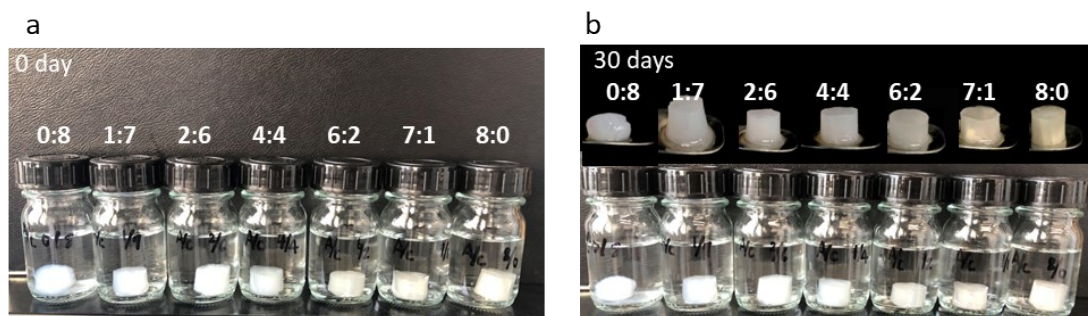

**Figure S10.** Photos of water stability tests of ion-crosslinked samples with the different ratio of alginate and oxidized cellulose (prepared with an ice growth velocity of 25  $\mu\text{m/s}$ ); (a) immediately after the immersion in the water, (b) 30 days after the immersion.

**Table S1.** Mechanical properties of hydrogels with an ice growth velocity of 25  $\mu\text{m/s}$  with different compositions of alginate/oxidized cellulose (A:C) after ion-crosslinking.

|     | Young's modulus / MPa | Toughness / $\text{J/m}^3$ | Yield stress / KPa | Compression stress $\epsilon=20\%$ / KPa | Compression stress $\epsilon=40\%$ / KPa | Compression stress $\epsilon=60\%$ / KPa |
|-----|-----------------------|----------------------------|--------------------|------------------------------------------|------------------------------------------|------------------------------------------|
| 0:8 | $0.003 \pm 0.001$     | $0.04 \pm 0.01$            | $0.7 \pm 0.2$      | $0.3 \pm 0.1$                            | $0.8 \pm 0.2$                            | $1.6 \pm 0.5$                            |
| 1:7 | $0.008 \pm 0.003$     | $0.08 \pm 0.02$            | $0.8 \pm 0.3$      | $1.0 \pm 0.1$                            | $1.8 \pm 0.2$                            | $3.8 \pm 0.8$                            |
| 2:6 | $0.032 \pm 0.017$     | $0.15 \pm 0.03$            | $1.5 \pm 0.2$      | $2.1 \pm 0.4$                            | $2.7 \pm 0.5$                            | $5.3 \pm 1.1$                            |
| 4:4 | $0.034 \pm 0.015$     | $0.23 \pm 0.05$            | $3.4 \pm 1.1$      | $3.9 \pm 0.9$                            | $4.4 \pm 0.8$                            | $6.1 \pm 1$                              |
| 6:2 | $0.070 \pm 0.017$     | $0.31 \pm 0.05$            | $4.1 \pm 0.9$      | $5.1 \pm 1$                              | $5.8 \pm 0.9$                            | $8.4 \pm 1.1$                            |
| 7:1 | $0.084 \pm 0.019$     | $0.40 \pm 0.05$            | $6.0 \pm 0.9$      | $6.5 \pm 0.9$                            | $7.3 \pm 0.6$                            | $11.4 \pm 1.5$                           |
| 8:0 | $0.096 \pm 0.036$     | $0.39 \pm 0.08$            | $5.0 \pm 1.5$      | $5.8 \pm 1.3$                            | $7.5 \pm 1.3$                            | $10.8 \pm 1.9$                           |

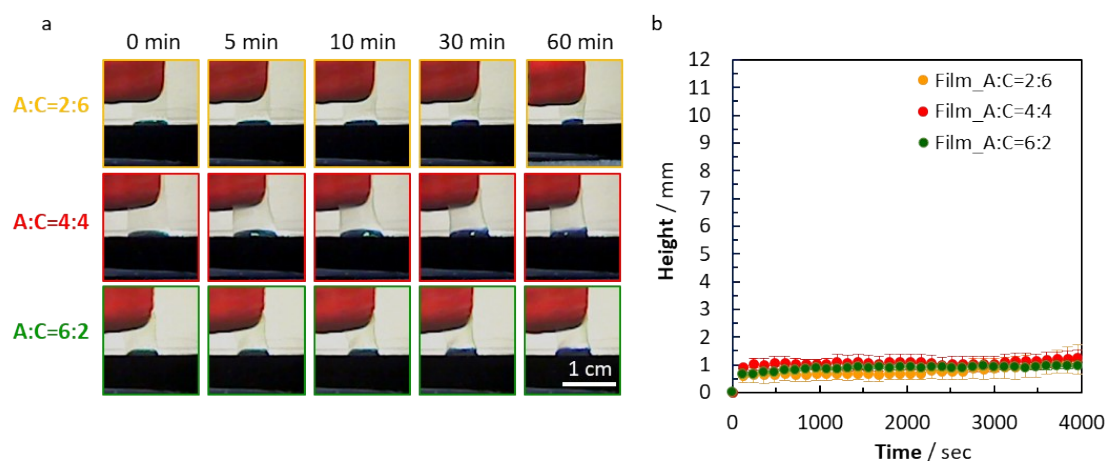

**Figure S11.** Liquid transport experiment using the films with different compositions of alginate and oxidized cellulose. (a) Optical photos showing capillary action behavior. (b) Time-liquid height curves.

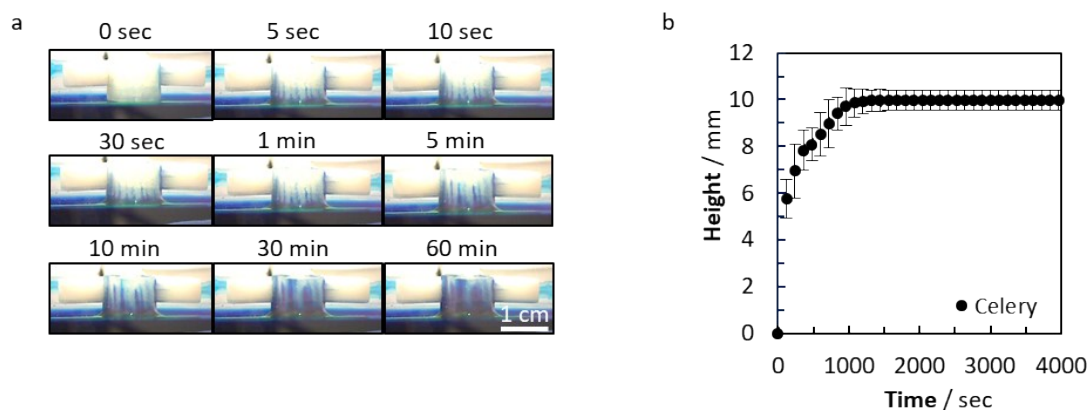

**Figure S12.** Liquid transport experiment with celery. (a) Optical photos showing capillary action behavior. (b) Time-liquid height curves and rising speeds of celery.



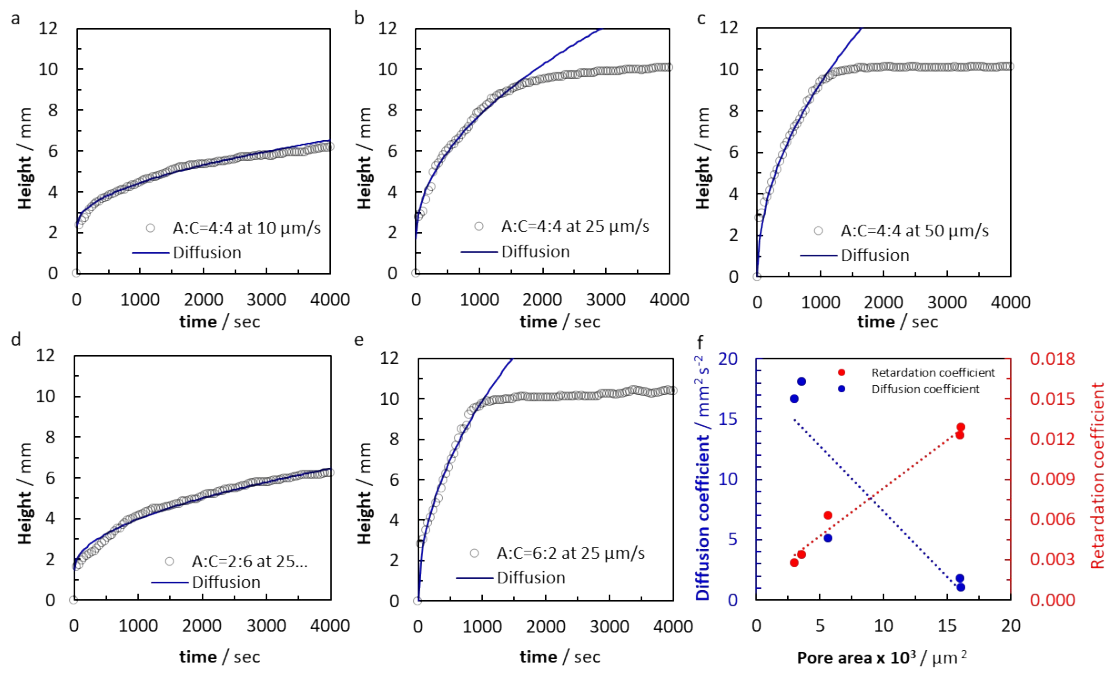

**Figure S13.** Capillary water transport behavior of hydrogels prepared with different ice-growth velocities (a-c) and different compositions of alginate and oxidized cellulose (d and e) and those theoretical curves fitting to the equation of mean square displacement (i.e.  $h(t)^2=6Dt$ ), (f) trends among pore area, diffusion coefficients, and retardation coefficients. Dashed lines are a guide to the eye.
